# Supplementary material for: Predicted Norovirus Resurgence in 2021-2022 Due to the Relaxation of Nonpharmaceutical Interventions Associated with COVID-19 Restrictions in England: A Mathematical Modelling Study
Source: medRxiv preprint, doi:10.1101/2021.07.09.21260277, version 2 (2021-09-03)
Supplement: AF 4 [file 260277_file10.docx]

**Additional file 4**

**Details of ‘Polymod’ and ‘Comix’ contact matrices**

The dates provided here are the corresponding dates used in Jarvis et al [2].

| **Date** | **Corresponding matrix** | **Average number of contacts (unweighted)** | **Estimate of R0*** |
| --- | --- | --- | --- |
| 01/01/2020 | 0. Polym | 11.12 | 1.81 |
| 23/03/2020 | 1. Lockdown 1 | 3.23 | 0.43 |
| 04/06/2020 | 2. Lockdown 1 easing | 3.96 | 0.55 |
| 30/07/2020 | 3. Relaxed restrictions | 5.5 | 0.77 |
| 04/09/2020 | 4. School reopening | 7.79 | 1.29 |
| 05/11/2020 | 5. Lockdown 2 | 5.87 | 0.99 |
| 03/12/2020 | 6. Lockdown 2 easing | 6.61 | 1.07 |
| 20/12/2020 | 7. Christmas | 3.51 | 0.47 |
| 05/01/2021 | 8. Lockdown 3 | 3.47 | 0.48 |
| 09/03/2021 | 9. Lockdown 3 + schools | 5.65 | 0.91 |
| 17/05/2021 | 10. School reopening | 7.79 | 1.28 |
| 19/07/2021 | 11. Polym (if 80% of contacts in adults) | 9.17 | 1.52 |
| 1/07/2023 | End of simulation |  |  |

* R0 is estimated for each period of time by finding the proportional difference in the dominant eigenvalue of the symmetrical contact matrix when compare to the “Polymod” contact matrix used prior to NPIs associated with the COVID-19 pandemic.
